# Supplementary material
Source: MDPI journal article supplement (https://www.mdpi.com/2311-5637/10/4/175)
Supplement: s1 [file s1 › fermentation-2886343-supplementary.pdf]

## Supplementary Material

**Title:** Multi-Omics Analysis of the Co-Regulation of Wood Alcohol Accumulation in Baijiu Fermentation

**Authors:** Tong Liu 1,2,†, Qingqing Cao 3,4,†, Fan Yang 3,4, Jianjun Lu 3,4, Xianglian Zeng 3,4, Jianghua Li 1,2, Guocheng Du 1,2, Huabin Tu 3,4 and Yanfeng Liu 1,2,\*

### Affiliations:

<sup>1</sup> Key Laboratory of Carbohydrate Chemistry and Biotechnology, Ministry of Education, School of Biotechnology, Jiangnan University, Wuxi 214122, China;

13912396309@163.com (T.L.); lijianhua@jiangnan.edu.cn (J.L.)

<sup>2</sup> Science Center for Future Foods, Jiangnan University, Wuxi 214122, China

<sup>3</sup> Kweichow Moutai Co., Ltd., Renhuai 564501, China; felong225@163.com

<sup>4</sup> Guizhou Key Laboratory of Microbial Resources Exploration in Fermentation Industry, Kweichow Moutai

Group, Zunyi 564501, China

\* Correspondence: yanfengliu@jiangnan.edu.cn; Tel.: +86-510-851-971-17

† These authors contributed equally to this work.

### \*Corresponding authors:

Yanfeng Liu

Tel.: +86-510-85197117, Fax: +86-510-85918309, E-mail: yanfengliu@jiangnan.edu.cn; Key Laboratory of Carbohydrate Chemistry and Biotechnology, Ministry of Education, Jiangnan University, Wuxi 214122, China

## Figures

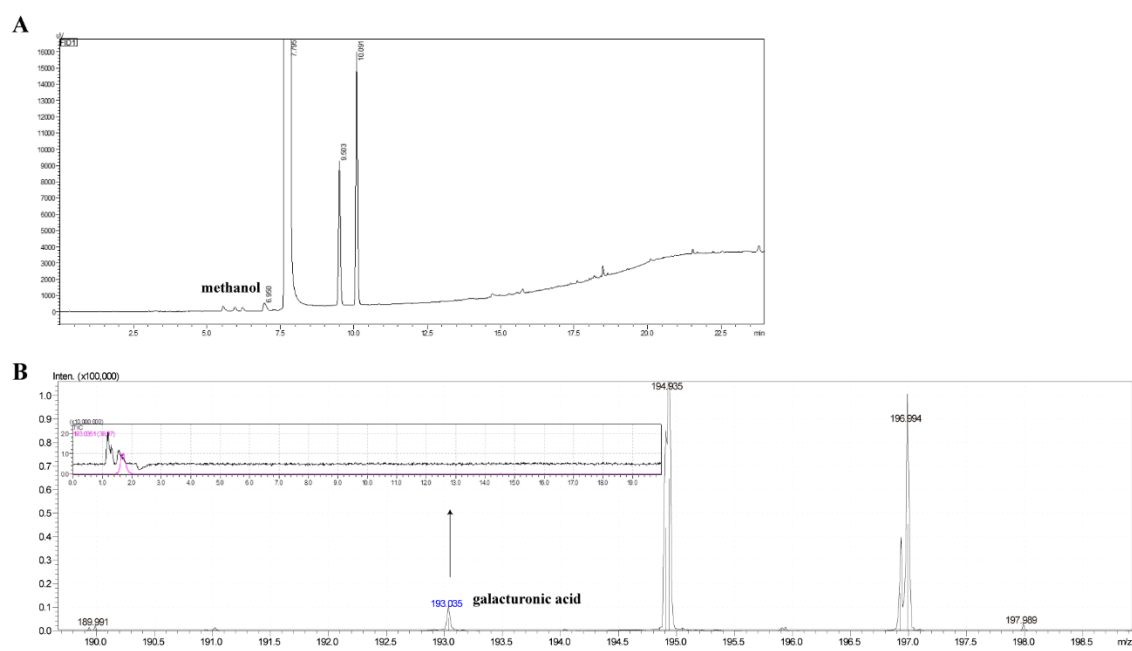

**Figure S1. A: Characteristic peak of methanol retention time. B: Characteristic peak of galacturonic acid m/z ratio.**

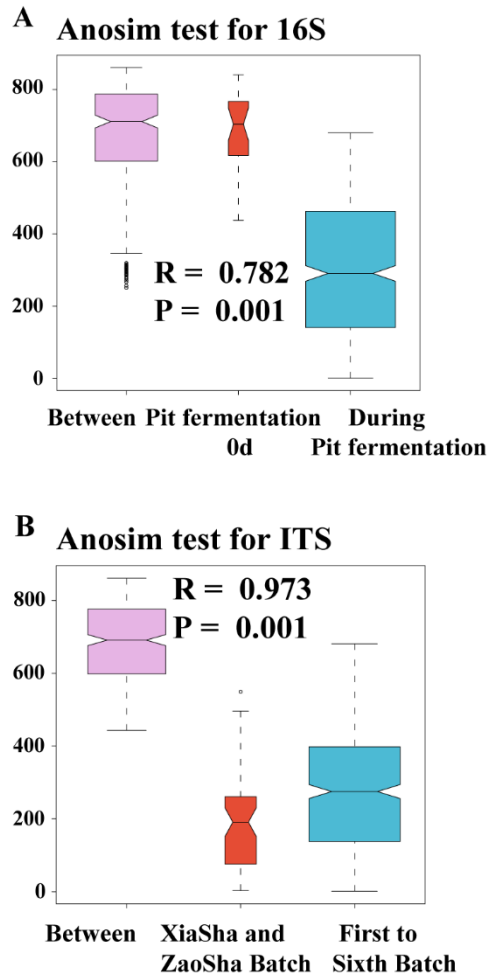

**Figure S2. A: Anosim test for 16S grouping. B: Anosim test for ITS grouping** (The “R” value is used to validate whether there are differences between different groups, the larger the R, the greater the differences between groups, while the “P” value is used to indicate the significance of the differences, with  $P < 0.05$  indicating a significant correlation).

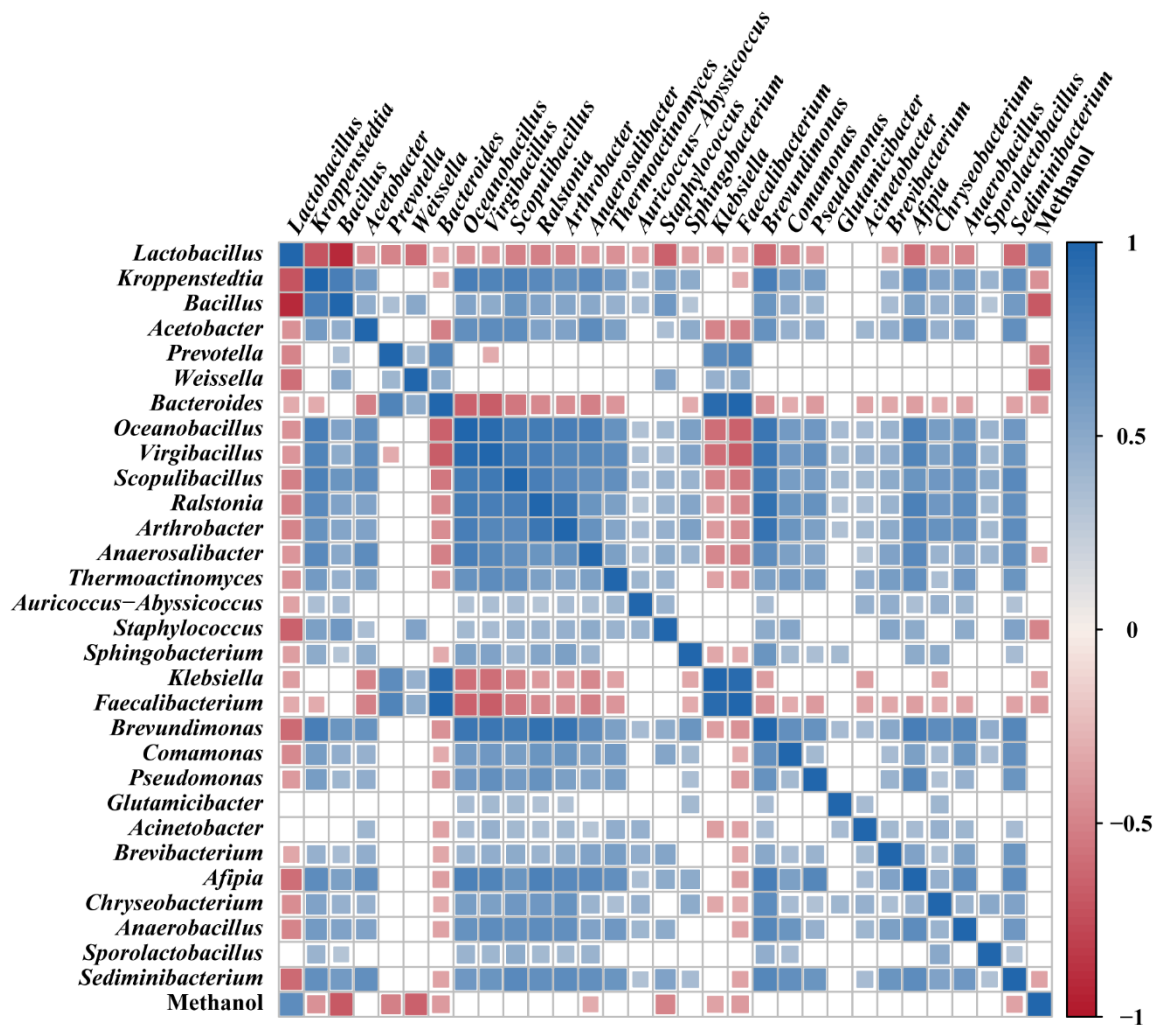

**Figure S3. Spearman's correlation analysis of methanol and bacteria (with the sum of all sample's relative abundance greater than 0.5%).** Correlation matrix (Spearman test,  $p \leq 0.05$ ) showing the correlation coefficients between methanol content and bacteria genera. Positive correlations are displayed in blue and negative correlations in red. The color intensity and size of the square were proportional to the correlation coefficients. On the right side of the correlogram, the legend shows the correlation coefficients and the corresponding colors.

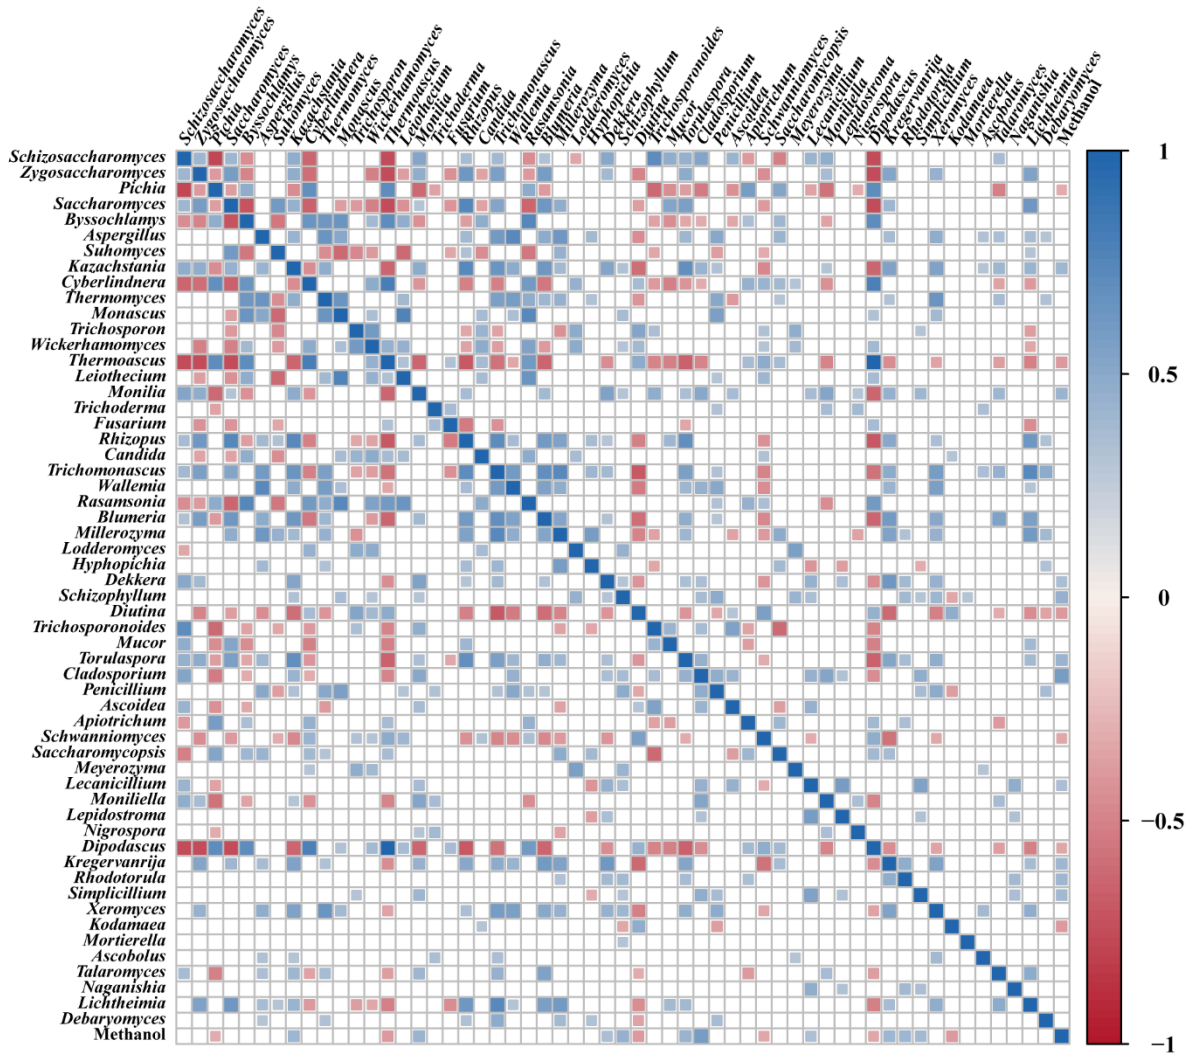

**Figure S4. Spearman's correlation analysis of methanol and fungi (with the sum of all sample's relative abundance greater than 0.5%).** Correlation matrix (Spearman test,  $p \leq 0.05$ ) showing the correlation coefficients between the methanol content and fungal genera. Positive correlations are displayed in blue and negative correlations in red. The color intensity and the size of the square are proportional to the correlation coefficients. In the right side of the correlogram, the legend shows the correlation coefficients and the corresponding colors.

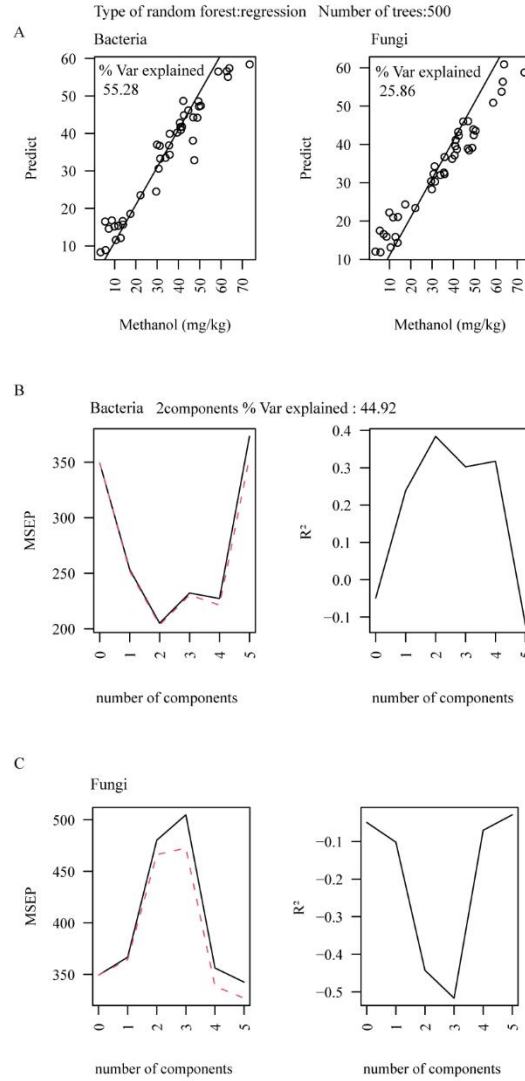

**Figure S5. The major parameters of model establishment.** A: The use of random forest to model the changes in microbial abundance and methanol content (% Var explained represents the degree of explanation of the changes in the abundance of microbial communities to the changes in methanol) B: The analysis of bacterial abundance and methanol content changes by PLS regression (the number of components represents the number of selected principal components, MSEP is the predicted mean square error of the regression model, the larger the MSEP, the greater the regression error,  $R^2$  is used to evaluate the degree of regression fit, the larger the  $R^2$ , the better the regression fit).

## Tables

Table S1 The compound identification for methanol content detection

| Name               | retention time/min |
|--------------------|--------------------|
| methanol           | 6.95               |
| ethanol            | 7.795              |
| 2-Methyl-2-butanol | 10.091             |

Table S2 The corresponding enzyme names for KO related to methanol metabolism

| KO     | EC Number              | Enzyme name                                                              |
|--------|------------------------|--------------------------------------------------------------------------|
| K00002 | [EC:1.1.1.2]           | alcohol dehydrogenase (NADP+)                                            |
| K00012 | [EC:1.1.1.22]          | UDPglucose 6-dehydrogenase                                               |
| K00122 | [EC:1.17.1.9]          | formate dehydrogenase                                                    |
| K00128 | [EC:1.2.1.3]           | aldehyde dehydrogenase (NAD+)                                            |
| K00134 | [EC:1.2.1.12]          | glyceraldehyde 3-phosphate dehydrogenase                                 |
| K00138 | [EC:1.2.1.-]           | aldehyde dehydrogenase                                                   |
| K00148 | [EC:1.2.1.46]          | glutathione-independent formaldehyde dehydrogenase                       |
| K00626 | [EC:2.3.1.9]           | acetyl-CoA C-acetyltransferase                                           |
| K00627 | [EC:2.3.1.12]          | pyruvate dehydrogenase E2 component (dihydrolipoamide acetyltransferase) |
| K00656 | [EC:2.3.1.54]          | formate C-acetyltransferase                                              |
| K00688 | [EC:2.4.1.1]           | glycogen phosphorylase                                                   |
| K00693 | [EC:2.4.1.11]          | glycogen synthase                                                        |
| K00700 | [EC:2.4.1.18]          | 1,4-alpha-glucan branching enzyme                                        |
| K00873 | [EC:2.7.1.40]          | pyruvate kinase                                                          |
| K00927 | [EC:2.7.2.3]           | phosphoglycerate kinase                                                  |
| K00963 | [EC:2.7.7.9]           | UTP--glucose-1-phosphate uridylyltransferase                             |
| K01027 | [EC:2.8.3.5]           | 3-oxoacid CoA-transferase                                                |
| K01034 | [EC:2.8.3.8 2.8.3.9]   | acetate CoA/acetoacetate CoA-transferase alpha subunit                   |
| K01067 | [EC:3.1.2.1]           | acetyl-CoA hydrolase                                                     |
| K01184 | [EC:3.2.1.15]          | polygalacturonase                                                        |
| K01196 | [EC:2.4.1.25 3.2.1.33] | glycogen debranching enzyme                                              |
| K01574 | [EC:4.1.1.4]           | acetoacetate decarboxylase                                               |
| K01623 | [EC:4.1.2.13]          | fructose-bisphosphate aldolase, class I                                  |
| K01640 | [EC:4.1.3.4]           | hydroxymethylglutaryl-CoA lyase                                          |
| K01641 | [EC:2.3.3.10]          | hydroxymethylglutaryl-CoA synthase                                       |
| K01689 | [EC:4.2.1.11]          | enolase                                                                  |
| K01810 | [EC:5.3.1.9]           | glucose-6-phosphate isomerase                                            |
| K01834 | [EC:5.4.2.11]          | 2,3-bisphosphoglycerate-dependent phosphoglycerate mutase                |
| K01835 | [EC:5.4.2.2]           | phosphoglucomutase                                                       |
| K03841 | [EC:3.1.3.11]          | fructose-1,6-bisphosphatase I                                            |
| K15633 | [EC:5.4.2.12]          | 2,3-bisphosphoglycerate-independent phosphoglycerate mutase              |
| K17066 | [EC:1.1.3.13]          | alcohol oxidase                                                          |
| K18372 | [EC:3.1.1.114]         | methyl acetate hydrolase                                                 |
| K00895 | [EC:2.7.1.90]          | diphosphate-dependent phosphofructokinase                                |
| K00163 | [EC:1.2.4.1]           | pyruvate dehydrogenase E1 component                                      |
| K00132 | [EC:1.2.1.10]          | acetaldehyde dehydrogenase (acetylating)                                 |
| K01051 | [EC:3.1.1.11]          | pectinesterase                                                           |
| K01213 | [EC:3.2.1.67]          | galacturan 1,4-alpha-galacturonidase                                     |

|        |                         |                                                 |
|--------|-------------------------|-------------------------------------------------|
| K01812 | [EC:5.3.1.12]           | glucuronate isomerase                           |
| K21619 | [EC:5.1.2.7]            | tagaturonate epimerase                          |
| K16258 |                         | mxkK protein                                    |
| K17067 | [EC:1.2.98.1 1.1.99.37] | formaldehyde dismutase / methanol dehydrogenase |
| K18371 | [EC:1.14.13.226]        | acetone monooxygenase (methyl acetate-forming)  |

---
